# Supplementary material
Source: Springer Nature journal article supplement (https://www.springermedizin.de/resource/supplementary/12968_2008_57_MOESM6_ESM.pdf/9577892)

**a**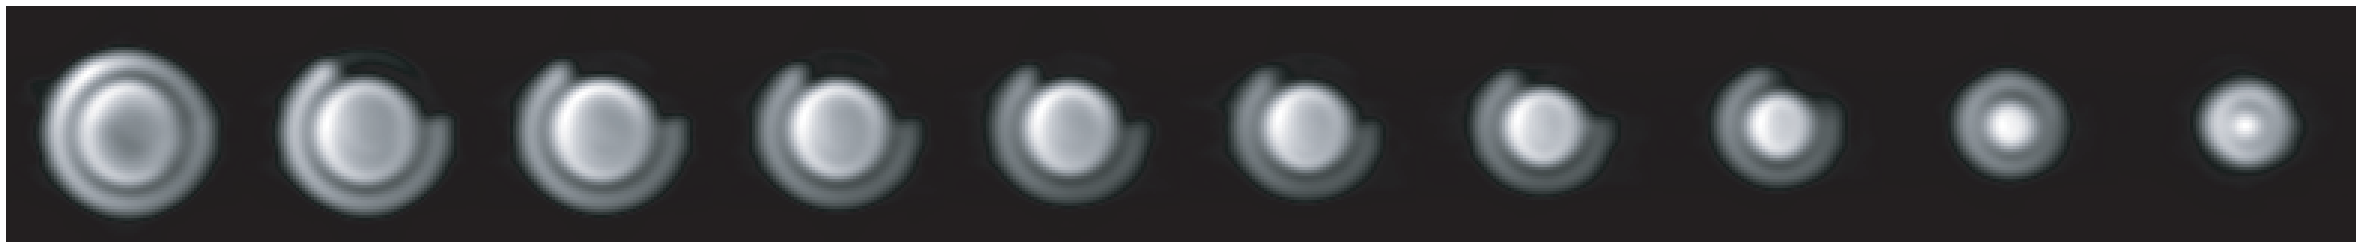**b**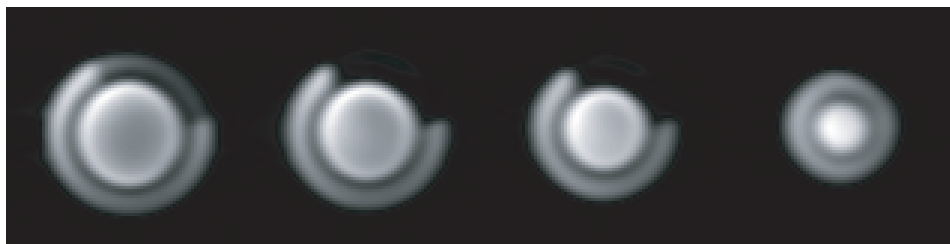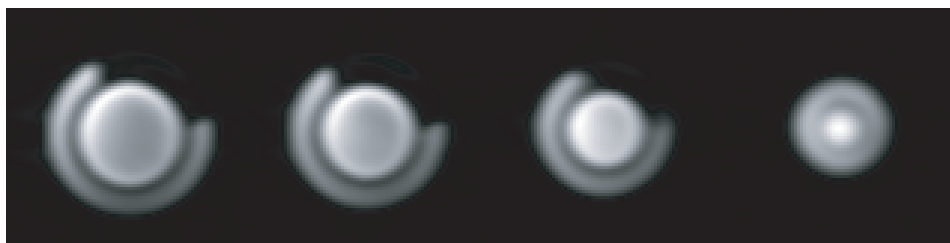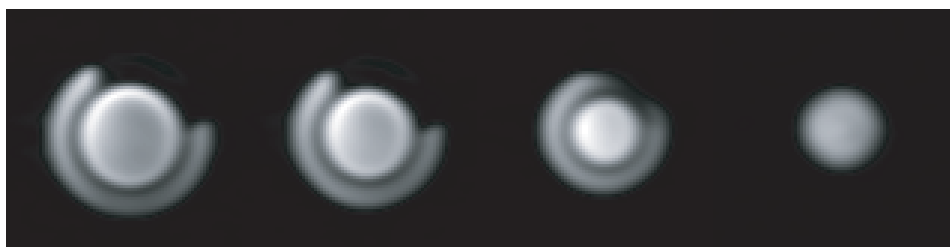**+10mm shift in z****reference scan plane****-10mm shift in z****c**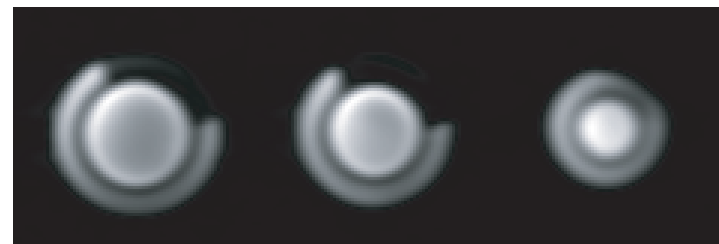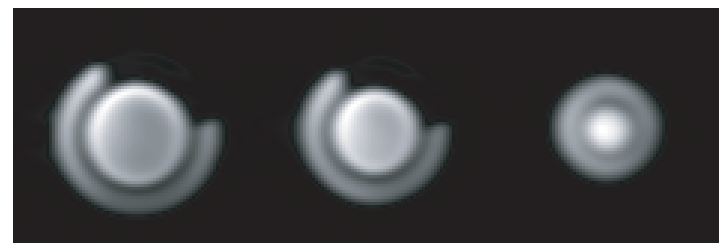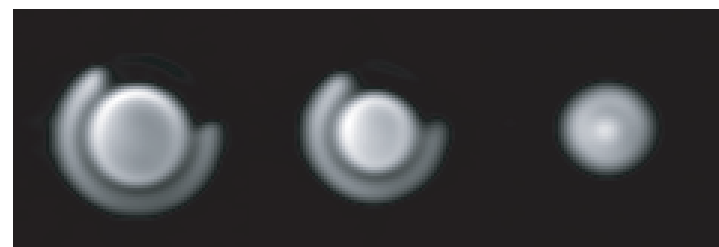

Supplement: MOESM6 [file 9577892]
